# Supplementary material
Source: publisher site journal article supplement (https://www.dovepress.com/article/305179)
Supplement: Supplementary file 1 [file get_supplementary_file.php]

**Supplemental Figure 1a**

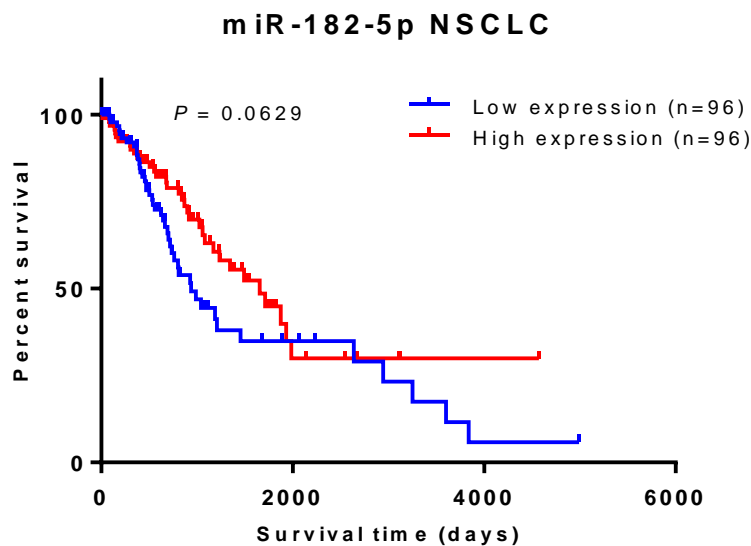

**Supplemental Figure 1b**

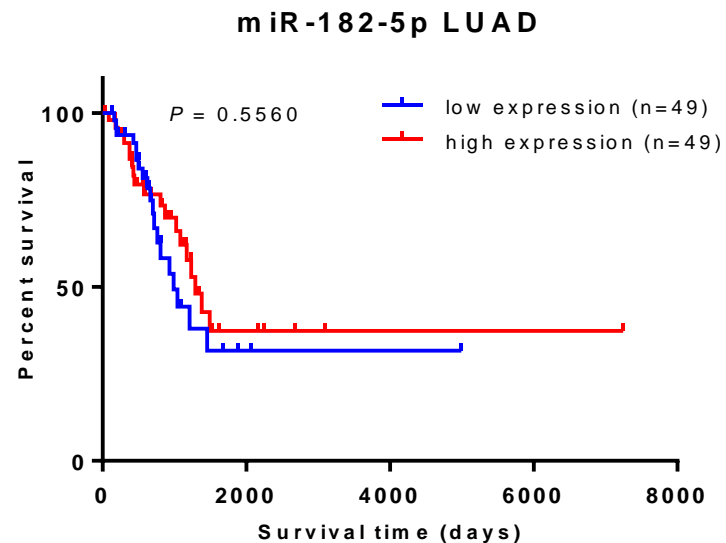

**Supplemental Figure 1c**

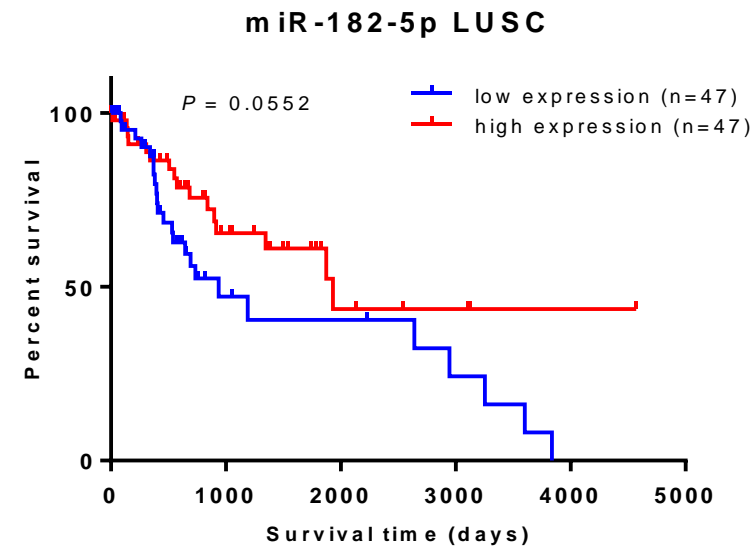

**Supplemental Figure 1** Bioinformatics analysis of the prognostic value of miR-182-5p in TCGA database. a, b and c. Kaplan-Meier curves of NSCLC cases in TCGA database stratified by miR-182-3p expression (bottom 10% [n = 96] versus top 10% [n = 96]) (a). Further respective analysis in LUAD cases (b) and LUSC cases (c) also showed no significant difference between two groups. LUAD, lung adenocarcinoma. LUSC, lung squamous cell carcinoma.
